# Supplementary material
Source: PubMed Central journal article supplement (PMC5718045)
Supplement: NIHMS923554-supplement-Supp_Figs.pdf [file NIHMS923554-supplement-Supp_Figs.pdf]

**a**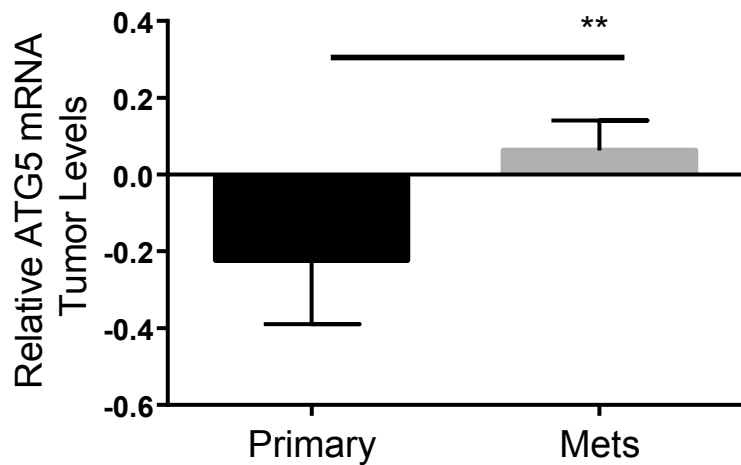**b**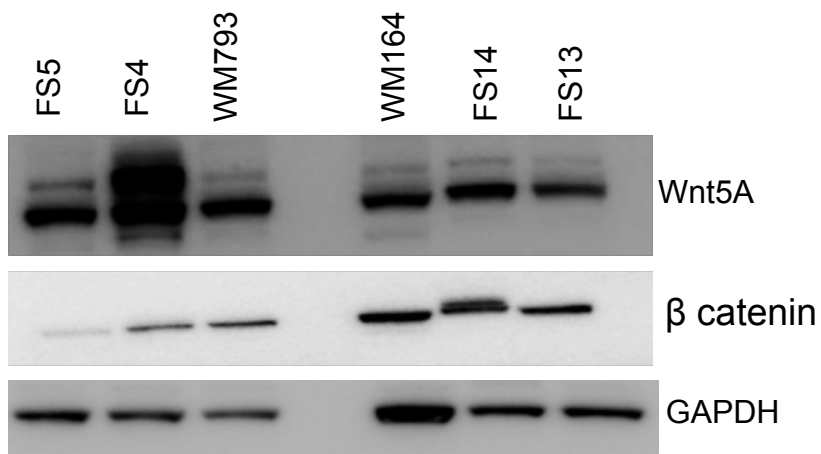**c**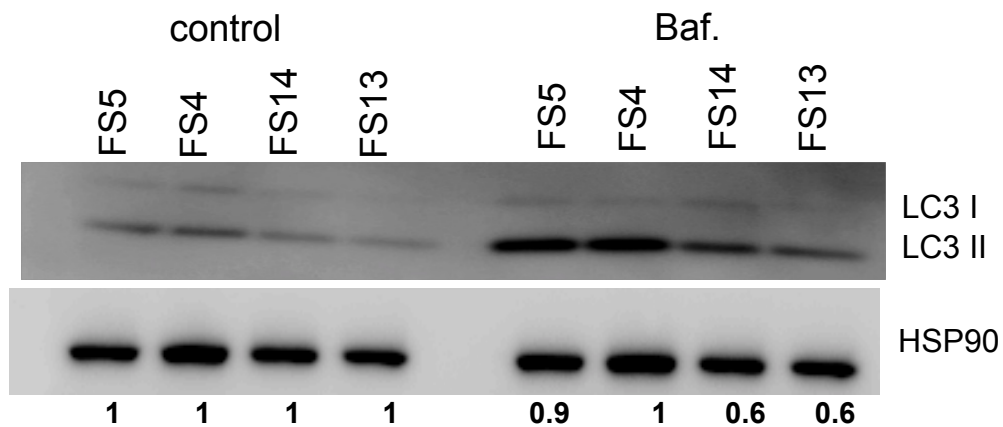**Supplementary Figure 1**

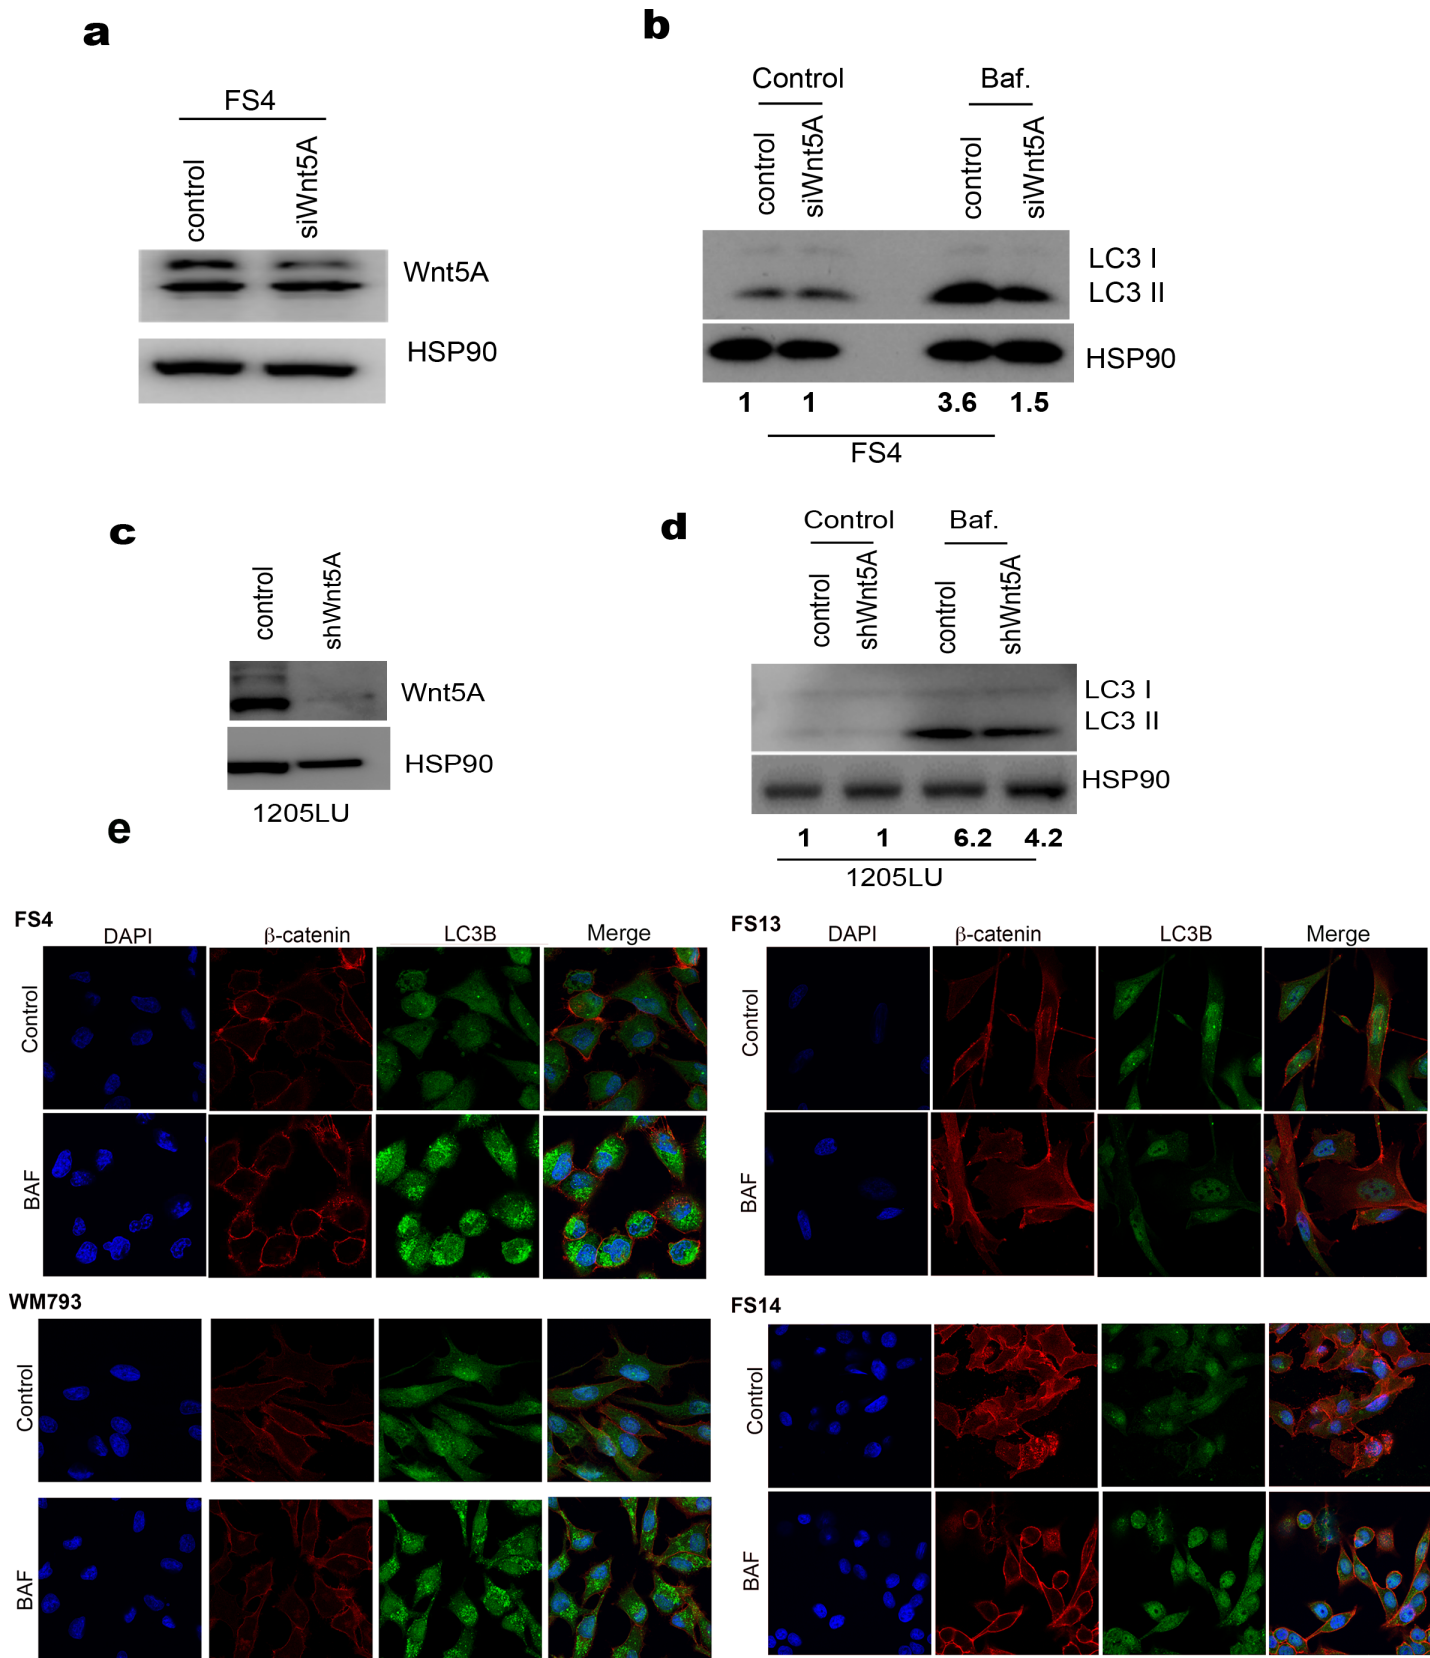

**Supplementary Figure 2**

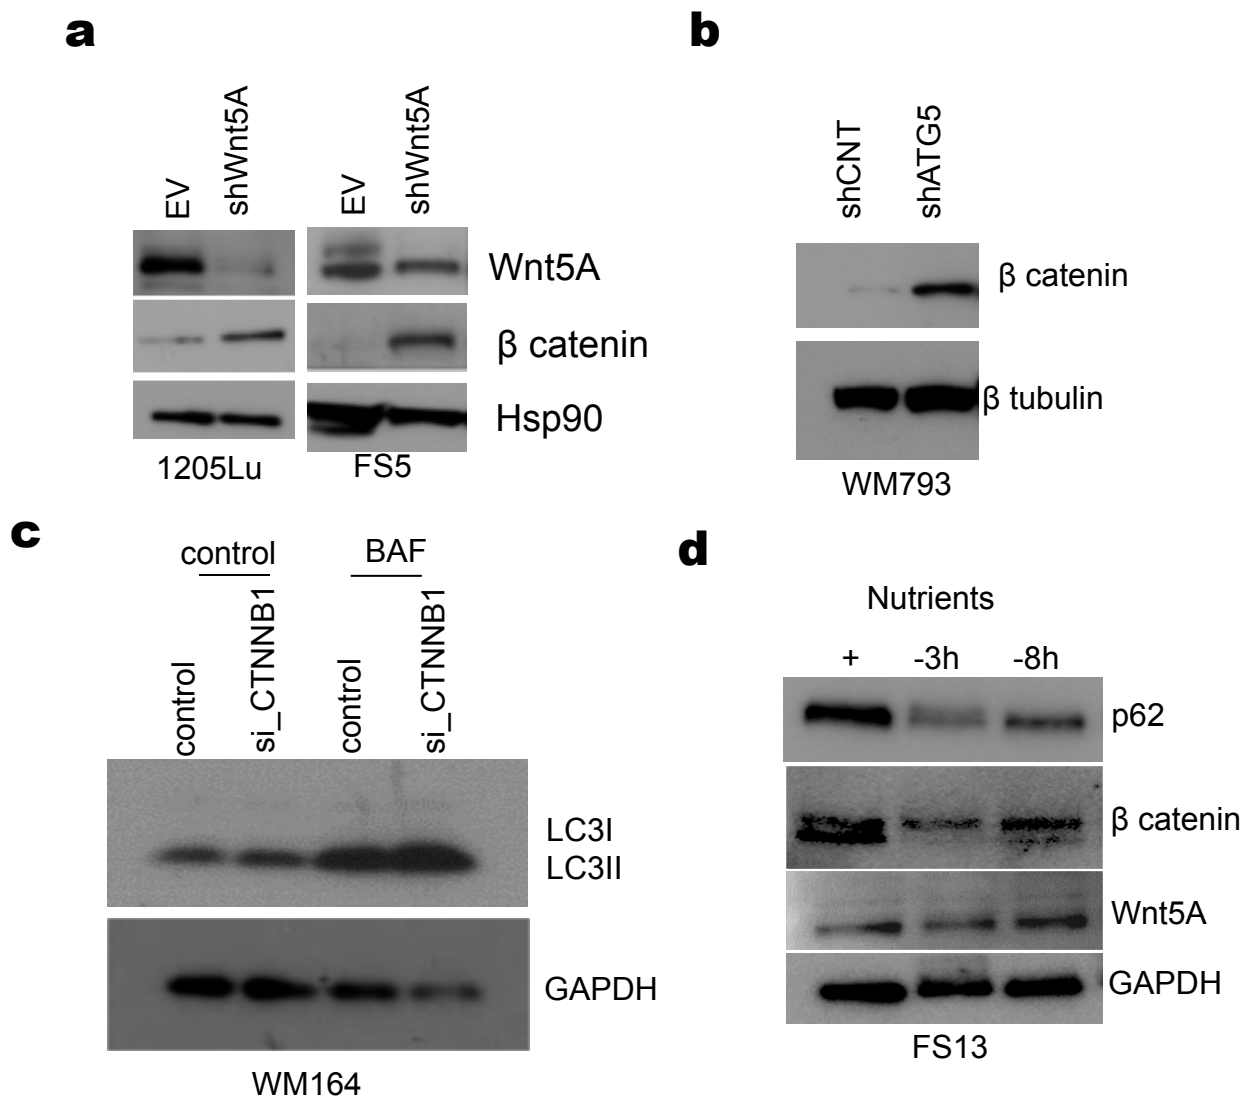

**Supplementary Figure 3**

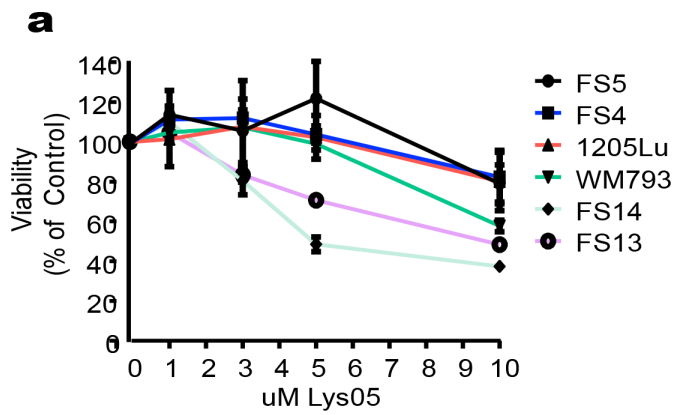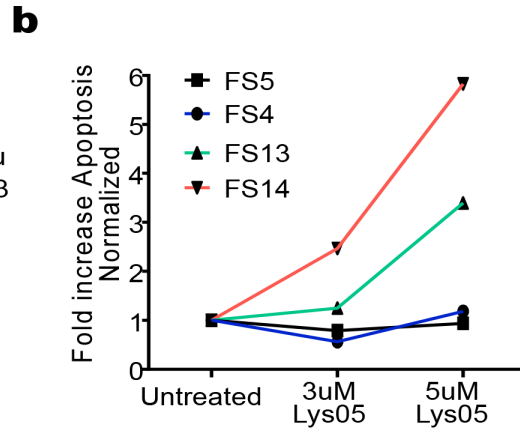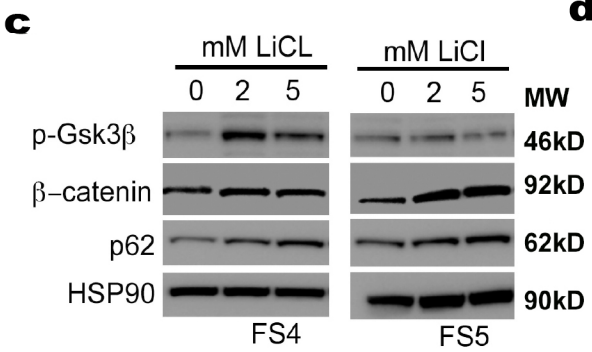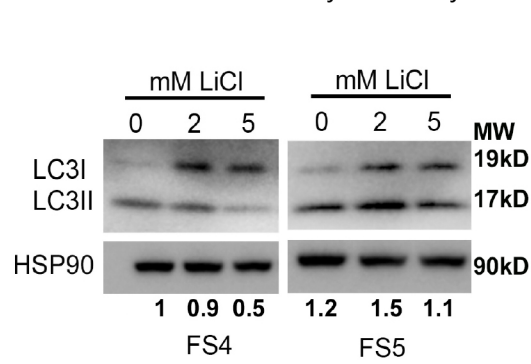

**e**

**BLISS NUMBER**

| WM35      | Lys05 |      |      |      |      |      |      |  |
|-----------|-------|------|------|------|------|------|------|--|
| LY2090314 | 10    | 6.67 | 4.44 | 2.96 | 1.98 | 1.32 | 0.88 |  |
| 20        | 5     | 9    | -9   | -16  | -8   | -7   | 4    |  |
| 10        | 4     | 17   | -8   | -12  | -17  | -27  | -23  |  |
| 5         | 2     | 10   | -3   | 2    | -8   | -5   | 1    |  |
| 2.5       | -5    | -16  | -12  | -30  | 2    | -9   | -2   |  |
| 1.25      | -8    | -23  | -16  | -20  | -5   | -5   | -12  |  |

  

| WM164     | Lys05 |      |      |      |      |      |      |  |
|-----------|-------|------|------|------|------|------|------|--|
| LY2090314 | 10    | 6.67 | 4.44 | 2.96 | 1.98 | 1.32 | 0.88 |  |
| 20        | 1     | 2    | 10   | -27  | -24  | -22  | -16  |  |
| 10        | 2     | 3    | 9    | -13  | -20  | -18  | -11  |  |
| 5         | 1     | 2    | -7   | -2   | -11  | -12  | -7   |  |
| 2.5       | 2     | 2    | -5   | -13  | -11  | -11  | 2    |  |
| 1.25      | 0     | 1    | -1   | -7   | -2   | -3   | -3   |  |

**INHIBITION**

| LY2090314 | Lys05 |      |      |      |      |      |      |     |  |
|-----------|-------|------|------|------|------|------|------|-----|--|
|           | 10    | 6.67 | 4.44 | 2.96 | 1.98 | 1.32 | 0.88 | 0   |  |
| 20        | 94    | 20   | -25  | -32  | -33  | -28  | -22  | -29 |  |
| 10        | 94    | 40   | -7   | -12  | -24  | -31  | -32  | -11 |  |
| 5         | 91    | 31   | -6   | -2   | -20  | -12  | -11  | -14 |  |
| 2.5       | 86    | 10   | -7   | -25  | -1   | -7   | -6   | -6  |  |
| 1.25      | 83    | 6    | -7   | -11  | -3   | 1    | -11  | -1  |  |
| 0         | 91    | 31   | 10   | 10   | 3    | 6    | 2    | 12  |  |

  

| LY2090314 | Lys05 |      |      |      |      |      |      |    |  |
|-----------|-------|------|------|------|------|------|------|----|--|
|           | 10    | 6.67 | 4.44 | 2.96 | 1.98 | 1.32 | 0.88 | 0  |  |
| 20        | 110   | 110  | 32   | -7   | -4   | 2    | 0    | 12 |  |
| 10        | 110   | 110  | 37   | 13   | 5    | 11   | 11   | 19 |  |
| 5         | 110   | 109  | 19   | 23   | 13   | 15   | 14   | 17 |  |
| 2.5       | 110   | 109  | 21   | 11   | 12   | 16   | 21   | 16 |  |
| 1.25      | 110   | 109  | 15   | 7    | 11   | 14   | 6    | 5  |  |
| 0         | 110   | 108  | 12   | 9    | 9    | 13   | 5    | 8  |  |

**Supplementary Figure 4**

## **Supplemental Figure Legends.**

### **Supplementary Figure 1. Wnt5A expression correlates with high autophagy**

**in melanoma. A.** *ATG5* expression is increased in metastatic melanoma ( $p=0.003$ ). **B.** Western blot of Wnt5A and  $\beta$ -catenin in Wnt5A-high (FS5, FS4, WM793) and Wnt5A-low (WM164, FS14, FS13) melanoma cells; loading control: GAPDH. **C.** Western blot of LC3II/I levels in Wnt5A-high (FS5, FS4) and Wnt5A-low (FS14, FS13) melanoma cells upon bafilomycin treatment for the measurement of autophagy flux; loading control: HSP90. Numbers represent ratio of Baf. (LC3II/HSP90) to control (LC3II/HSP90).

### **Supplementary Figure 2. Wnt5A increases autophagy in melanoma. A.**

Western blot of Wnt5A levels in FS4 melanoma cells upon siRNA-mediated knockdown of Wnt5A; loading control: HSP90. **B.** Western blot of LC3II/I levels in FS4 control and FS4 siWnt5A melanoma cells upon bafilomycin treatment for the measurement of autophagy flux; loading control: HSP90. Numbers represent ratio of Baf. (LC3II /HSP90) to control (LC3II/ HSP90). **C.** Western blot of Wnt5A in 1205LU upon shRNA-mediated knockdown of Wnt5A; loading control: HSP90. **D.** Western blot of LC3II/I levels in 1205LU control and 1205LU shWnt5A melanoma cells upon bafilomycin treatment for the measurement of autophagy flux; loading control: HSP90. Numbers represent ratio of Baf. (LC3II/HSP90) to control (LC3II/HSP90). **E.** Immunofluorescence analysis of  $\beta$ -catenin (CTNNb1) (red) and LC3 (green) in FS4, WM793 (CTNNb1-low melanoma cells) and FS13,

FS14 (CTNNB1-high melanoma cells) upon treatment with bafilomycin showing a negative correlation between  $\beta$ -catenin levels and autophagy; DAPI, 4,6-diamidino-2-phenylindole (blue).

**Supplementary Figure 3. ATG5 affects Wnt signaling in melanoma. A.**

Western blot of Wnt5A and  $\beta$ -catenin in 1205Lu and FS5 upon shRNA-mediated knockdown of Wnt5A confirming that Wnt5A downregulates  $\beta$ -catenin; loading control: HSP90. **B.** Western blot of  $\beta$ -catenin levels in WM793 upon shRNA-mediated knockdown of ATG5; loading control:  $\beta$ -tubulin. **C.** Western blot of LC3II/I levels in WM164 control and WM164 si-CTNNB1 melanoma cells upon bafilomycin treatment for the measurement of autophagy flux; loading control: GAPDH. **D.** Western blot of p62,  $\beta$ -catenin and Wnt5A in FS13 melanoma cells after serum starvation for 3 and 8 hours; loading control: GAPDH.

**Supplementary Figure 4.  $\beta$ -catenin increases the sensitivity of melanoma cells to autophagy inhibition. A.**

Measurement of cell viability by MTS assay in low  $\beta$  catenin/high Wnt5A melanoma cells (FS5, FS4, WM793 and 1205LU) and high  $\beta$  catenin/low Wnt5A melanoma cells (FS14, FS13) upon treatment with Lys05 at the indicated doses; graph represents viability as a percent of control. **B.** Annexin V/PI staining for the measurement of apoptosis in  $\beta$ -catenin low (FS5, FS4) and  $\beta$ -catenin high (FS13, FS14) cells. Data presented as fold increase in apoptosis normalized to control for each cell line. **C.** Western blot of phospho-GSK3 $\beta$ ,  $\beta$ -catenin, and p62 in FS4 and FS5 melanoma cells treated with the GSK3 inhibitor (LiCl: lithium chloride) at the indicated doses for 8 hours; loading control: HSP90. **D.** Western blot of LC3II/I levels in FS4 and FS5 cells upon

treatment with the GSK3 inhibitor LiCl (Lithium Chloride) for 8 hours at the indicated doses; loading control HSP90. Numbers represent ratio of LC3II normalized to control. **E.** Melanoma cells with high  $\beta$ -catenin (WM35 and WM164) were treated with the indicated doses of the GSK3 inhibitor LY2090314 for 7 hours followed by the addition of Lys05 for 72 hours; cell growth was assessed by Alamar Blue. Synergy was calculated using the Bliss formula; the bliss numbers for each combination are color coded from red to green. Red represents no synergy (additive) effects of the two compounds. Green values are combinations with synergy greater than 20. The inhibition seen with each drug combination is color coded as a gradient from red (0%) through white (50%) to blue (100%) inhibition.

**SUPPLEMENTAL TABLE 1: DENSITOMETRY FOR ALL WESTERNS**

|                          |             |                |                 |              |              |
|--------------------------|-------------|----------------|-----------------|--------------|--------------|
| <b>Figure 1F</b>         | WM35        | WM793          | 1205LU          |              |              |
| Wnt5A/HSP90              | 0.3         | 1              | 0.9             |              |              |
| p62/HSP90                | 0.7         | 0.1            | 0.3             |              |              |
| ATG5/HSP90               | 0.1         | 0.6            | 0.7             |              |              |
|                          |             |                |                 |              |              |
| <b>Figure 2D</b>         | 0 (control) | 100ng/ml       | 200 ng/ml       |              |              |
| Wnt5A (top bands)/HSP90  | 0.04        | 0.2            | 1               |              |              |
| Wnt5A (both bands)/HSP90 | 0.4         | 0.5            | 1.6             |              |              |
| p62/HSP90                | 1.1         | 0.6            | 0.4             |              |              |
|                          |             |                |                 |              |              |
| <b>Figure 2F</b>         | C           | sh1            | sh2             |              |              |
| Wnt5A top band/HSP90     | 1           | 0.3            | 0.2             |              |              |
| Wnt5A (both bands)/HSP90 | 2.2         | 1.1            | 0.8             |              |              |
|                          |             |                |                 |              |              |
| <b>Figure 3B</b>         | WM793 ctrl  | WM793 shATG5-1 | FS4 ctrl        | FS4 shATG5-1 | FS4 shATG5-2 |
| ATG5/HSP90               | 0.9         | 0.05           | 0.4             | 0.07         | 0.05         |
| Wnt5A/HSP90              | 0.3         | 0.01           | 0.8             | 0.3          | 0.7          |
|                          |             |                |                 |              |              |
| <b>Figure 3G</b>         |             | FS4 CTRL       | FS4 shATG5      |              |              |
| ATG5/HSP90               |             | 0.9            | 0.3             |              |              |
| WNT5A (both bands)/HSP90 |             | 0.8            | 0.4             |              |              |
| WNT5A (upper band)/HSP90 |             | 0.5            | 0.09            |              |              |
| P62/HSP90                |             | 0.09           | 0.4             |              |              |
| B-catenin/HSP90          |             | 0.2            | 0.4             |              |              |
|                          |             |                |                 |              |              |
| <b>Figure 3H</b>         |             | WM164 CTRL     | WM164 si-CTNNB1 |              |              |
| B-catenin/HSP90          |             | 0.8            | 0.4             |              |              |
| p62/HSP90                |             | 1.2            | 0.6             |              |              |
| WNT5A /HSP90             |             | 0.2            | 0.6             |              |              |
|                          |             |                |                 |              |              |
| <b>Figure 3i</b>         | +           | -1 h           | -2 h            | -3 h         |              |



|                               |          |            |           |         |         |         |
|-------------------------------|----------|------------|-----------|---------|---------|---------|
| Wnt5A/HSP90                   | 0.4      | 0.7        | 0.8       | 0.8     |         |         |
| Beta catenin/HSP90            | 1.2      | 0.8        | 0.5       | 0.4     |         |         |
|                               |          |            |           |         |         |         |
| <b>Figure 4A</b>              | EV_1     | EV_2       | EV_3      | WNT5A_1 | WNT5A_2 | WNT5A_3 |
| Wnt5A/HSP90                   | 0.07     | 0.08       | 0.04      | 0.6     | 0.8     | 0.5     |
| B-catenin/HSP90               | 0.2      | 0.6        | 1.5       | 0.1     | 0.2     | 0.2     |
|                               |          |            |           |         |         |         |
| <b>Figure 4C: Nuclear</b>     | 1.7EV    | 2.1 CTNNB1 | 1.7_WNT5A |         |         |         |
| B-catenin/Histone H3          | 0.2      | 0.7        | 0.2       |         |         |         |
| <b>Figure 4C: Cytoplasmic</b> | 1.7EV    | 2.1 CTNNB1 | 1.7_WNT5A |         |         |         |
| B-catenin/b-tubulin           | 0.7      | 0.6        | 0.1       |         |         |         |
|                               |          |            |           |         |         |         |
| <b>Figure 5C</b>              | control  | shATG5     |           |         |         |         |
| Wnt5A/GAPDH                   | 1.3      | 0.5        |           |         |         |         |
| P-PKC/GAPDH                   | 0.5      | 0.2        |           |         |         |         |
| Total PKC/GAPDH               | 0.4      | 0.5        |           |         |         |         |
| P-CAMKII/GAPDH                | 0.7      | 0.3        |           |         |         |         |
| Total CAMKII/GAPDH            | 0.5      | 0.4        |           |         |         |         |
|                               |          |            |           |         |         |         |
| <b>Figure 6A</b>              | FS5      | FS4        | FS13      | FS14    |         |         |
| B-catenin/HSP90               | 0.2      | 0.5        | 1.7       | 2.2     |         |         |
| <b>FS5 Figure 6E</b>          | Ctrl (0) | 2nM        | 5nM       | 10nM    |         |         |
| B-catenin/HSP90               | 0.4      | 0.7        | 0.7       | 1.6     |         |         |
| p62/HSP90                     | 0.2      | 0.8        | 0.7       | 0.8     |         |         |
|                               |          |            |           |         |         |         |
| <b>FS4 Figure 6E</b>          | Ctrl (0) | 2nM        | 5nM       | 10nM    |         |         |
| B-catenin/HSP90               | 0.4      | 0.7        | 0.3       | 1.5     |         |         |
| p62/HSP90                     | 0.4      | 0.9        | 0.8       | 1       |         |         |

| <b>FS4-supp Fig 4C</b> | Ctrl (0) | 2mM | 5mM |
|------------------------|----------|-----|-----|
| P-GSK3 beta/HSP90      | 0.2      | 0.7 | 0.5 |
| Beta catenin/HSP90     | 0.3      | 0.5 | 0.4 |
| P62/HSP90              | 0.2      | 0.4 | 0.5 |
| <b>FS5-supp Fig 4C</b> | Ctrl (0) | 2mM | 5mM |
| P-GSK3 beta/HSP90      | 0.4      | 0.5 | 0.4 |
| Beta catenin/HSP90     | 0.3      | 0.6 | 0.7 |
| P62/HSP90              | 0.4      | 0.5 | 0.6 |

**Supplemental Table 2. Tissue microarrays (TMA) H scores.** Table showing score and diagnosis for the tissue microarray. Non-melanoma samples are highlighted in gray. MM: Malignant melanoma; Met: Metastatic; DN: Dysplastic Nevi; LN: Lymph Node; RCC: Renal cell cancer; SCC: Squamous cell cancer; CA: Cancer;

| <b>Diagnosis</b>                       | <b>Wnt5A<br/>H score</b> | <b>LC3<br/>H score</b> | <b>b-catenin<br/>H score</b> |
|----------------------------------------|--------------------------|------------------------|------------------------------|
| Skin SCC                               | 50                       | 110                    | 30                           |
| Met MM (metastatic malignant melanoma) | 100                      | 110                    | 180                          |
| DN (nevi)                              | 100                      | 160                    | 180                          |
| DN                                     | 80                       | 160                    | 110                          |
| Met MM                                 | 10                       | 50                     | 50                           |
| Met MM                                 | 20                       | 40                     | 60                           |
| Met MM                                 | 100                      | 200                    | 290                          |
| Met MM                                 | 100                      | 100                    | 290                          |
| Met MM                                 | 100                      | 220                    | 90                           |
| Met MM                                 | 190                      | 230                    | 80                           |
| Pleomorphic Lobular CA                 | 120                      | 80                     | 0                            |
| Met MM (to skin)                       | 30                       | 200                    | 270                          |
| Met MM                                 | 30                       | 200                    | 260                          |
| DN                                     | 100                      | 210                    | 250                          |
| Met MM                                 | 30                       | 80                     | 0                            |
| Invasive MM (invasive melanoma)        | 130                      | 200                    | 30                           |
| Invasive MM                            | 120                      | 200                    | 90                           |
| DN                                     | 120                      | 140                    | 170                          |
| Met MM                                 | 50                       | 140                    | 30                           |
| Met MM                                 | 90                       | 30                     | 0                            |
| Skin Normal                            | 0                        | 0                      | 0                            |
| Met Lobular CA                         | 110                      | 0                      | 0                            |
| Met MM                                 | 270                      | 280                    | 0                            |
| Met MM Skin Met                        | 250                      | 280                    | 10                           |
| DN                                     | 70                       | 30                     | 50                           |
| Invasive MM                            | 150                      | 140                    | 10                           |
| Invasive MM (Stage N1)                 | 140                      | 200                    | 0                            |
| Met MM                                 | 90                       | 90                     | 170                          |
| Met MM (Skin Met)                      | 130                      | 140                    | 30                           |
| (Lung Adeno Ca)                        | 100                      | 200                    | 0                            |
| Invasive MM                            | 20                       | 80                     | 0                            |
| Invasive MM (Desmoplastic deeper)      | 0                        | 40                     | 0                            |
| Invasive MM (center)                   | 30                       | 70                     | 0                            |
| Met MM                                 | 200                      | 300                    | 0                            |

|                                                                 |     |     |     |
|-----------------------------------------------------------------|-----|-----|-----|
| Met MM (1st S005-2863, #2 IV, 4.3 mm)                           | 160 | 280 | 0   |
| DN                                                              | 30  | 60  | 60  |
| Met MM (cut. Satellite)                                         | 200 | 210 | 140 |
| Met MM                                                          | 120 | 60  | 0   |
| Met MM                                                          | 60  | 50  | 0   |
| Met RCC                                                         | 100 | 200 | 60  |
| DN                                                              | 50  | 150 | 200 |
| Met MM (cut. Satellite)                                         | 120 | 200 | 60  |
| Met MM Epidermotropic                                           | 100 | 220 | 0   |
| Met MM LN (lymph node)                                          | 120 | 230 | 0   |
| Met MM (LN Met)                                                 | 150 | 200 | 0   |
| DN                                                              | 50  | 20  | 110 |
| Met MM                                                          | 200 | 200 | 20  |
| Met MM (LN MET)                                                 | 160 | 180 | 10  |
| Met MM                                                          | 180 | 120 | 0   |
| Met Sarcoma to skin                                             | 120 | 280 | 0   |
| Met MM                                                          | 100 | 200 | 200 |
| Met MM (Skin Met)                                               | 120 | 200 | 100 |
| DN                                                              | 30  | 50  | 60  |
| Met MM (Skin)                                                   | 160 | 90  | 50  |
| Invasive MM (Upper)                                             | 230 | 180 | 40  |
| Invasive MM (SLN neg, with lymphocytic inv satellite)           | 220 | 200 | 30  |
| Met MM                                                          | 110 | 80  | 70  |
| Met MM (to lung)                                                | 140 | 100 | 100 |
| DN                                                              | 60  | 10  | 30  |
| Met Adeno CA to Skin                                            | 20  | 30  | 0   |
| Met MM                                                          | 20  | 100 | 0   |
| Met MM (To Lung)                                                | 100 | 100 | 70  |
| Invasive MM                                                     | 70  | 10  | 60  |
| DN                                                              | 100 | 70  | 70  |
| Met MM                                                          | 100 | 60  | 140 |
| Met MM (to Lung)                                                | 120 | 100 | 100 |
| Invasive MM (IV, 3.25 mm, acral lenti, ulcerated, 4/mm, 2H, 2I) | 100 | 120 | 120 |
| Invasive MM                                                     | 80  | 180 | 0   |
| Desmoplastic, LM type, V, 10mm, SLN neg                         | 60  | 180 | 0   |
| Met MM                                                          | 110 | 10  | 70  |
| Met MM                                                          | 100 | 0   | 50  |
| Met MM                                                          | 100 | 0   | 30  |
| Met MM                                                          | 50  | 0   | 120 |

|                    |     |     |     |
|--------------------|-----|-----|-----|
| Met MM             | 100 | 100 | 220 |
| Met MM             | 100 | 100 | 190 |
| Met MM             | 30  | 30  | 100 |
| Met MM             | 140 | 120 | 120 |
| Met MM             | 70  | 30  | 70  |
| Met MM             | 130 | 20  | 30  |
| Met MM             | 0   | 0   | 0   |
| Met MM             | 10  | 0   | 0   |
| Met MM             | 150 | 80  | 70  |
| Met MM             | 110 | 120 | 50  |
| DN                 | 30  | 20  | 110 |
| Met Mm             | 10  | 20  | 110 |
| Met MM             | 10  | 30  | 100 |
| Met MM             | 100 | 120 | 300 |
| Met MM             | 20  | 120 | 300 |
| Met MM             | 80  | 50  | 0   |
| Met MM             | 30  | 0   | 0   |
| Met MM             | 130 | 20  | 0   |
| Met MM             | 120 | 20  | 0   |
| Met MM             | 90  | 40  | 0   |
| Met MM             | 100 | 30  | 10  |
| Met MM             | 130 | 100 | 70  |
| Met MM             | 120 | 200 | 80  |
| DN                 | 50  | 30  | 90  |
| Met MM             | 130 | 200 | 0   |
| Met MM             | 100 | 50  | 0   |
| Met MM             | 40  | 30  | 0   |
| Invasive MM        | 100 | 0   | 0   |
| Invasive MM        | 100 | 0   | 0   |
| Met MM             | 120 | 80  | 0   |
| Met MM             | 0   | 60  | 0   |
| Met MM             | 110 | 100 | 0   |
| Met MM             | 100 | 200 | 0   |
| Met MM             | 90  | 150 | 0   |
| DN                 | 50  | 60  | 100 |
| 1st MM             | 30  | 90  | 10  |
| 1 <sup>st</sup> MM | 40  | 0   | 0   |
| Met Mm             | 140 | 100 | 90  |
| Met MM             | 10  | 10  | 0   |
| Met MM             | 110 | 130 | 0   |
| DN                 | 30  | 0   | 90  |

|                           |     |     |     |
|---------------------------|-----|-----|-----|
| Met MM                    | 110 | 100 | 0   |
| Met MM                    | 110 | 100 | 30  |
| Met MM                    | 90  | 120 | 40  |
| Met MM                    | 20  | 100 | 60  |
| Met MM                    | 100 | 250 | 300 |
| Met MM                    | 90  | 110 | 300 |
| Met MM                    | 0   | 0   | 0   |
| Met MM                    | 0   | 0   | 0   |
| Met MM                    | 0   | 0   | 0   |
| Met MM                    | 20  | 0   | 0   |
| Met MM                    | 100 | 20  | 0   |
| Met MM                    | 100 | 20  | 0   |
| Met colon Ca to liver     | 100 | 30  | 110 |
| Met MM                    | 120 | 200 | 10  |
| Met MM                    | 110 | 200 | 0   |
| Met MM                    | 120 | 70  | 300 |
| Small bowel               | 150 | 10  | 80  |
| Met MM                    | 100 | 90  | 90  |
| Met MM                    | 120 | 90  | 80  |
| Invasive MM               | 0   | 0   | 100 |
| DN                        | 30  |     | 40  |
| DN                        | 20  | 0   | 50  |
| Serous Ca (peritoneal ca) | 30  | 0   | 90  |
| Invasive ductal Ca        | 70  | 70  | 10  |
| Met MM to Bowel           | 70  | 0   | 0   |
| LN Met MM                 | 30  | 0   | 0   |
| Met MM to lung (FS)       | 0   | 0   | 80  |
| Met MM to lung (FS)       | 50  | 0   | 80  |
| LN Met MM                 | 70  | 100 | 200 |
| Invasive MM               | 100 | 100 | 100 |
| Invasive MM               | 100 | 50  | 40  |
| Subcut met MM             | 30  | 90  | 0   |
| Subcut met MM             | 40  | 120 | 0   |
| LN Met MM                 | 40  | 0   | 70  |
| DN                        | 0   | 0   | 70  |
| LN Met MM                 | 0   | 0   | 0   |
| MM nasal sinus            | 0   | 80  | 0   |
| MM nasal sinus            | 100 | 70  | 0   |
| Invasive MM               | 100 | 20  | 100 |
| Invasive MM               | 130 | 80  | 100 |
| LN Met MM                 | 0   | 140 | 90  |
| LN Met MM                 | 70  | 70  | 70  |
| Lung control              | 100 | 100 | 30  |
| Met MM LN TB05-632        | 70  | 0   | 30  |

|                         |     |     |     |
|-------------------------|-----|-----|-----|
| Met MM LN TB05-632      | 100 | 0   | 30  |
| LN Met MM               | 140 | 10  | 0   |
| LN Met MM               | 120 | 20  | 0   |
| Invasive MM             | 110 | 150 | 120 |
| LN Met MM               | 100 | 160 | 0   |
| LN Met mM               | 100 | 170 | 0   |
| Lung Met mm             | 90  | 180 | 0   |
| Lung Met mm             | 20  | 20  | 0   |
| LN Met mm               | 70  | 0   | 200 |
| Invasive MM             | 170 | 110 | 70  |
| Invasive MM             | 30  | 0   | 0   |
| Invasive Mm             | 10  | 100 | 0   |
| Lung Met MM TB05-209    | 50  | 100 | 150 |
| Lung Met MM TB05-209    | 50  | 70  | 150 |
| LN Met MM TB05-206      | 0   | 100 | 30  |
| LN Met MM TB05-206      | 0   | 70  | 0   |
| Invasive MM             | 40  | 0   | 30  |
| LN Met MM TB05-268      | 70  | 50  | 200 |
| LN Met MM TB05-268      | 60  | 90  | 200 |
| Met MM                  | 80  | 120 | 0   |
| Invasive MM             | 150 | 130 | 145 |
| Bone met MM             | 50  | 100 | 10  |
| Parotid Met MM TB05-638 | 100 | 0   | 100 |
| LN met mm               | 80  | 0   | 0   |
| Bowel Met MM            | 200 | 0   | 15  |
| LN Met MM TB05-788      | 10  | 0   | 100 |
| Invasive MM             | 10  | 0   | 20  |
| LN met MM               | 100 | 0   | 90  |
| LN met MM               | 100 | 0   | 90  |
| Lung Met MM             | 90  | 110 | 0   |
| Lung Met MM             | 90  | 100 | 0   |
| LN Met MM               | 0   | 50  | 0   |
| LN Met MM               | 0   | 0   |     |
| DN                      | 90  | 0   | 100 |
| DN upper                | 90  | 0   | 90  |
| DN lower                | 100 | 70  | 90  |
| DN                      | 0   | 0   | 100 |
| Lung ca                 | 80  | 120 | 0   |
