# Supplementary material
Source: PubMed Central journal article supplement (PMC5718045)
Supplement: NIHMS923554-supplement-Supp_Table.pdf [file NIHMS923554-supplement-Supp_Table.pdf]

**SUPPLEMENTAL TABLE 1: DENSITOMETRY FOR ALL WESTERNS**

|                          |             |                |                 |              |              |
|--------------------------|-------------|----------------|-----------------|--------------|--------------|
| <b>Figure 1F</b>         | WM35        | WM793          | 1205LU          |              |              |
| Wnt5A/HSP90              | 0.3         | 1              | 0.9             |              |              |
| p62/HSP90                | 0.7         | 0.1            | 0.3             |              |              |
| ATG5/HSP90               | 0.1         | 0.6            | 0.7             |              |              |
|                          |             |                |                 |              |              |
| <b>Figure 2D</b>         | 0 (control) | 100ng/ml       | 200 ng/ml       |              |              |
| Wnt5A (top bands)/HSP90  | 0.04        | 0.2            | 1               |              |              |
| Wnt5A (both bands)/HSP90 | 0.4         | 0.5            | 1.6             |              |              |
| p62/HSP90                | 1.1         | 0.6            | 0.4             |              |              |
|                          |             |                |                 |              |              |
| <b>Figure 2F</b>         | C           | sh1            | sh2             |              |              |
| Wnt5A top band/HSP90     | 1           | 0.3            | 0.2             |              |              |
| Wnt5A (both bands)/HSP90 | 2.2         | 1.1            | 0.8             |              |              |
|                          |             |                |                 |              |              |
| <b>Figure 3B</b>         | WM793 ctrl  | WM793 shATG5-1 | FS4 ctrl        | FS4 shATG5-1 | FS4 shATG5-2 |
| ATG5/HSP90               | 0.9         | 0.05           | 0.4             | 0.07         | 0.05         |
| Wnt5A/HSP90              | 0.3         | 0.01           | 0.8             | 0.3          | 0.7          |
|                          |             |                |                 |              |              |
| <b>Figure 3G</b>         |             | FS4 CTRL       | FS4 shATG5      |              |              |
| ATG5/HSP90               |             | 0.9            | 0.3             |              |              |
| WNT5A (both bands)/HSP90 |             | 0.8            | 0.4             |              |              |
| WNT5A (upper band)/HSP90 |             | 0.5            | 0.09            |              |              |
| P62/HSP90                |             | 0.09           | 0.4             |              |              |
| B-catenin/HSP90          |             | 0.2            | 0.4             |              |              |
|                          |             |                |                 |              |              |
| <b>Figure 3H</b>         |             | WM164 CTRL     | WM164 si-CTNNB1 |              |              |
| B-catenin/HSP90          |             | 0.8            | 0.4             |              |              |
| p62/HSP90                |             | 1.2            | 0.6             |              |              |
| WNT5A /HSP90             |             | 0.2            | 0.6             |              |              |
|                          |             |                |                 |              |              |
| <b>Figure 3i</b>         | +           | -1 h           | -2 h            | -3 h         |              |

|                               |          |            |           |         |         |         |
|-------------------------------|----------|------------|-----------|---------|---------|---------|
| Wnt5A/HSP90                   | 0.4      | 0.7        | 0.8       | 0.8     |         |         |
| Beta catenin/HSP90            | 1.2      | 0.8        | 0.5       | 0.4     |         |         |
|                               |          |            |           |         |         |         |
| <b>Figure 4A</b>              | EV_1     | EV_2       | EV_3      | WNT5A_1 | WNT5A_2 | WNT5A_3 |
| Wnt5A/HSP90                   | 0.07     | 0.08       | 0.04      | 0.6     | 0.8     | 0.5     |
| B-catenin/HSP90               | 0.2      | 0.6        | 1.5       | 0.1     | 0.2     | 0.2     |
|                               |          |            |           |         |         |         |
| <b>Figure 4C: Nuclear</b>     | 1.7EV    | 2.1 CTNNB1 | 1.7_WNT5A |         |         |         |
| B-catenin/Histone H3          | 0.2      | 0.7        | 0.2       |         |         |         |
| <b>Figure 4C: Cytoplasmic</b> | 1.7EV    | 2.1 CTNNB1 | 1.7_WNT5A |         |         |         |
| B-catenin/b-tubulin           | 0.7      | 0.6        | 0.1       |         |         |         |
|                               |          |            |           |         |         |         |
| <b>Figure 5C</b>              | control  | shATG5     |           |         |         |         |
| Wnt5A/GAPDH                   | 1.3      | 0.5        |           |         |         |         |
| P-PKC/GAPDH                   | 0.5      | 0.2        |           |         |         |         |
| Total PKC/GAPDH               | 0.4      | 0.5        |           |         |         |         |
| P-CAMKII/GAPDH                | 0.7      | 0.3        |           |         |         |         |
| Total CAMKII/GAPDH            | 0.5      | 0.4        |           |         |         |         |
|                               |          |            |           |         |         |         |
| <b>Figure 6A</b>              | FS5      | FS4        | FS13      | FS14    |         |         |
| B-catenin/HSP90               | 0.2      | 0.5        | 1.7       | 2.2     |         |         |
| <b>FS5 Figure 6E</b>          | Ctrl (0) | 2nM        | 5nM       | 10nM    |         |         |
| B-catenin/HSP90               | 0.4      | 0.7        | 0.7       | 1.6     |         |         |
| p62/HSP90                     | 0.2      | 0.8        | 0.7       | 0.8     |         |         |
|                               |          |            |           |         |         |         |
| <b>FS4 Figure 6E</b>          | Ctrl (0) | 2nM        | 5nM       | 10nM    |         |         |
| B-catenin/HSP90               | 0.4      | 0.7        | 0.3       | 1.5     |         |         |
| p62/HSP90                     | 0.4      | 0.9        | 0.8       | 1       |         |         |

| <b>FS4-supp Fig 4C</b> | Ctrl (0) | 2mM | 5mM |
|------------------------|----------|-----|-----|
| P-GSK3 beta/HSP90      | 0.2      | 0.7 | 0.5 |
| Beta catenin/HSP90     | 0.3      | 0.5 | 0.4 |
| P62/HSP90              | 0.2      | 0.4 | 0.5 |
| <b>FS5-supp Fig 4C</b> | Ctrl (0) | 2mM | 5mM |
| P-GSK3 beta/HSP90      | 0.4      | 0.5 | 0.4 |
| Beta catenin/HSP90     | 0.3      | 0.6 | 0.7 |
| P62/HSP90              | 0.4      | 0.5 | 0.6 |
